# Supplementary material for: Inadequacies in the representation of sub-seasonal phytoplankton dynamics in Earth system models
Source: Copernicus journal article supplement (doi:10.5194/bg-22-2163-2025), 2025-05-05
Supplement: Supplementary file 1 [file bg-22-2163-2025-supplement.pdf]

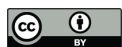

*Supplement of*

## **Inadequacies in the representation of sub-seasonal phytoplankton dynamics in Earth system models**

**Madhavan Girijakumari Keerthi et al.**

*Correspondence to:* Madhavan Girijakumari Keerthi ([keerthi.madhavan-girijakumari@locean.ipsl.fr](mailto:keerthi.madhavan-girijakumari@locean.ipsl.fr))

The copyright of individual parts of the supplement might differ from the article licence.

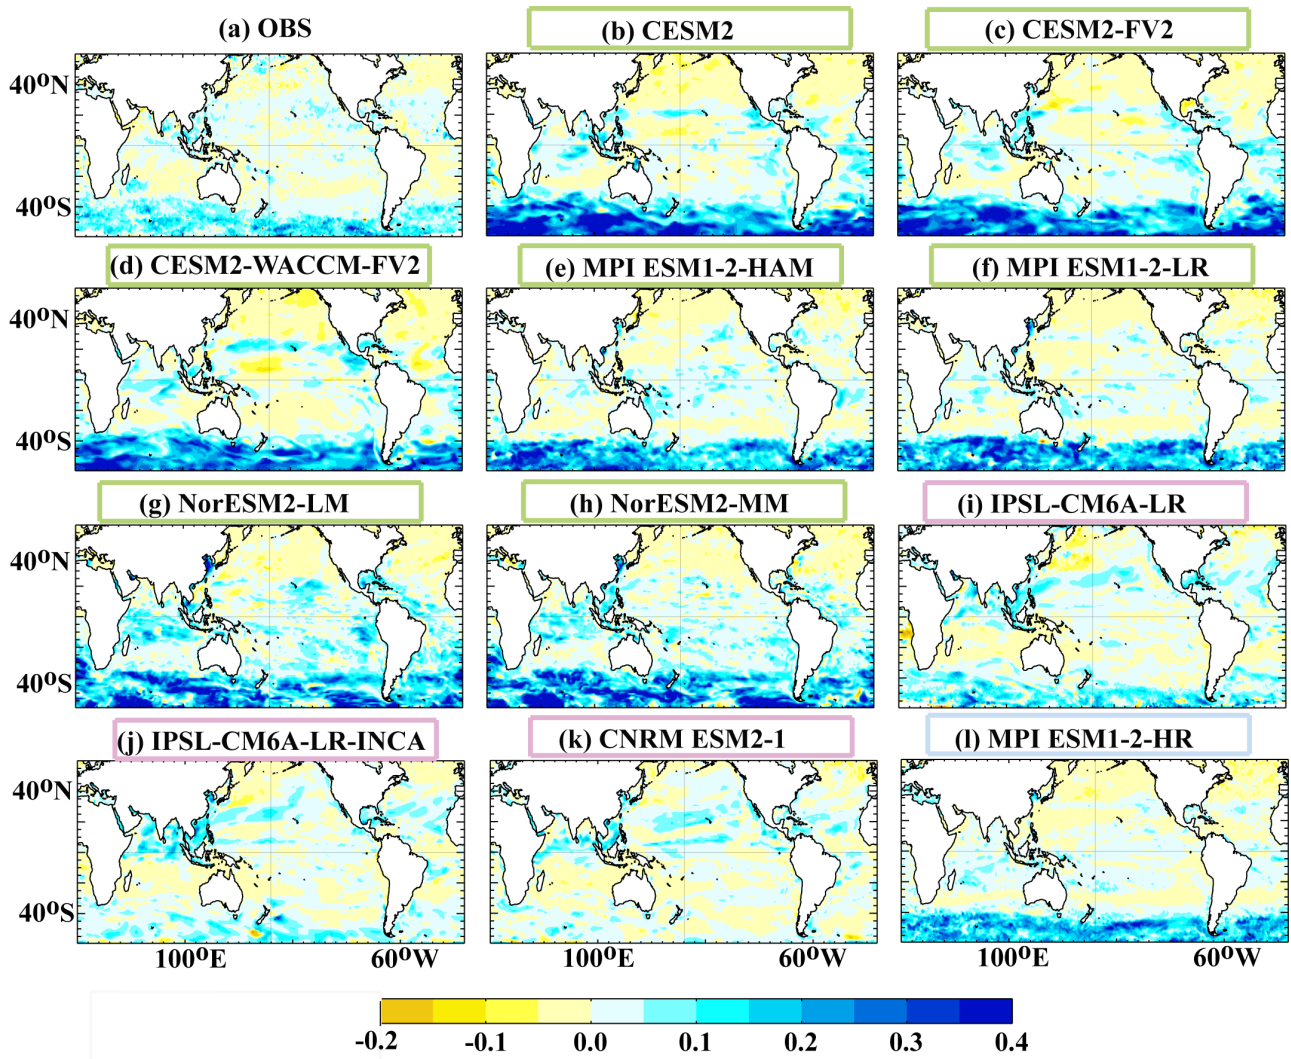

**Figure S1:** Regression of annual mean SCHl values on annual mean sub-seasonal values. Coloured boxes for the model names represent the different model groups described in Section 3.2, with green for Group 1, pink for Group 2, and blue for Group 3.

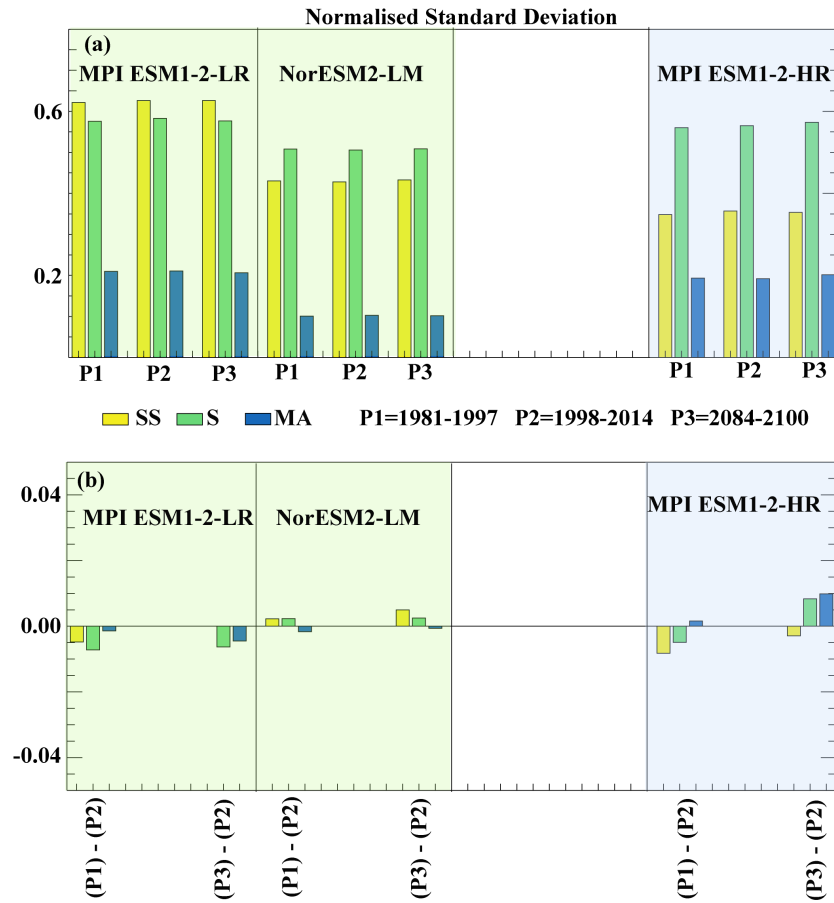

**Figure S2:** (a) Normalised standard deviation of SCHl from three different periods of piControl simulations (1981-1997, 1998-2014 & 2084-2100). (b) Difference between different periods considered. Shading in panel a and b represents the different model groups described in Section 3.2, with green for Group 1, and blue for Group 3.
